# Supplementary material for: Identification of an infectious bronchitis coronavirus strain exhibiting a classical genotype but altered antigenicity, pathogenicity, and innate immunity profile
Source: PubMed Central journal article supplement (PMC5120290; doi:10.1038/srep37725), 2016-11-23
Supplement: srep37725-s1.pdf [file srep37725-s1.pdf]

# **Identification of an infectious bronchitis coronavirus strain exhibiting a classical genotype but altered antigenicity, pathogenicity, and innate immunity profile**

Shu-Yi Lin<sup>1</sup>, Yao-Tsun Li<sup>1</sup>, You-Ting Chen<sup>1</sup>, Ting-Chih Chen<sup>1</sup>, Che-Ming J. Hu<sup>2,3</sup>, and Hui-Wen Chen<sup>1,3\*</sup>

<sup>1</sup>Department of Veterinary Medicine, National Taiwan University, Taipei, Taiwan

<sup>2</sup>Institute of Biomedical Sciences, Academia Sinica, Taipei, Taiwan

<sup>3</sup>Research Center for Nanotechnology and Infectious Diseases, Taipei, Taiwan

**Supplementary Figure S1.** Phylogenetic analyses of full length, E (envelope), M (membrane), and N (nucleocapsid) protein genes of IBV strains. The phylogenetic trees were constructed using the MEGA version 4 by the neighbor-joining method (bootstrapping for 1,000 replicates with its value >70%). The 3575/08 and 2575/98 strains analyzed in this study are indicated with red triangles. (AU: Australia, CN: China, NL: Netherlands, TW: Taiwan, UK: United Kingdom, US: United States, WA: Western Africa)

### Full length

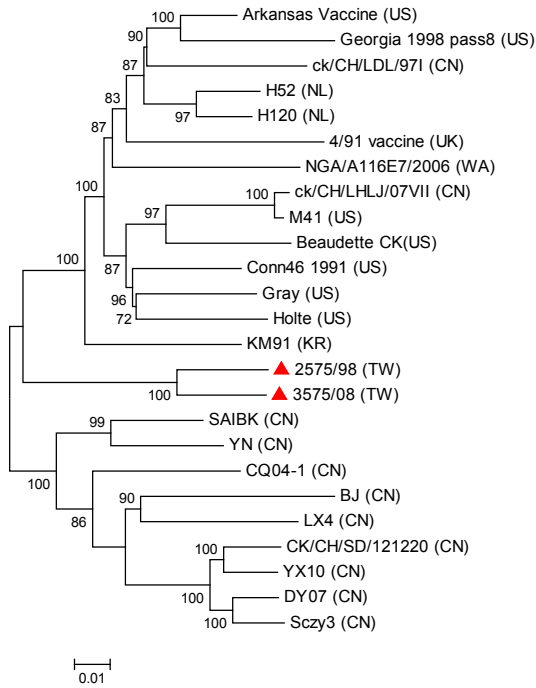

### E

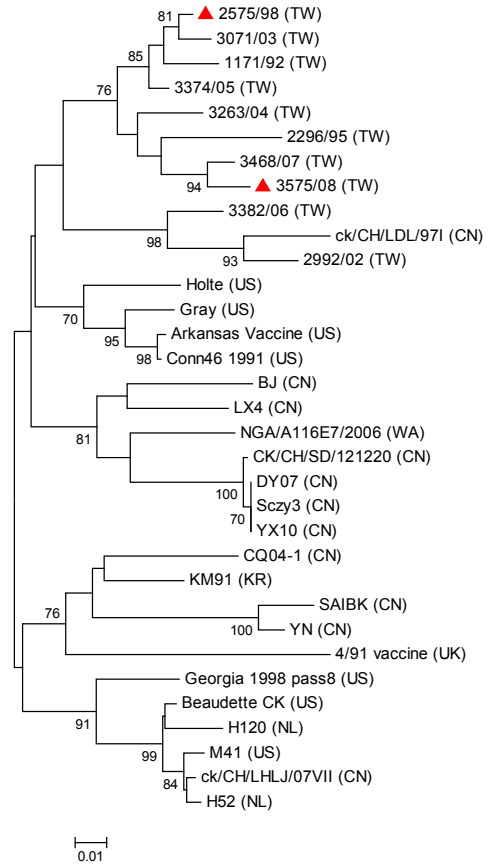

### M

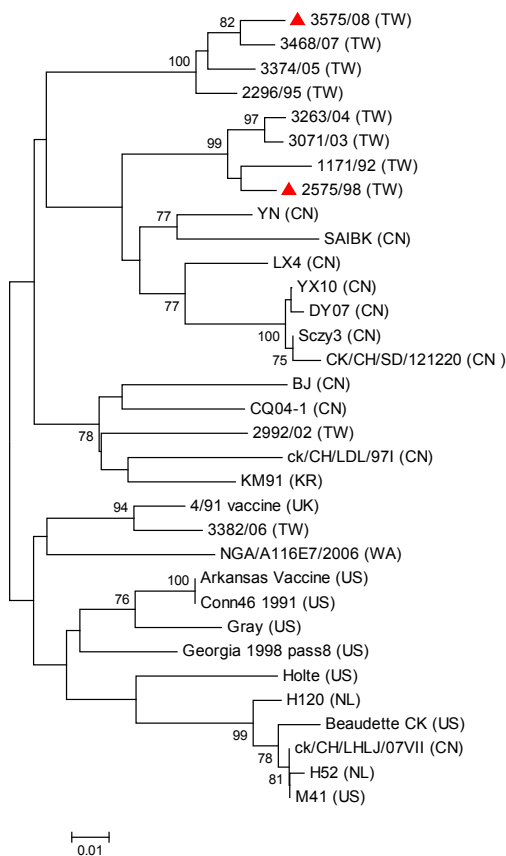

### N

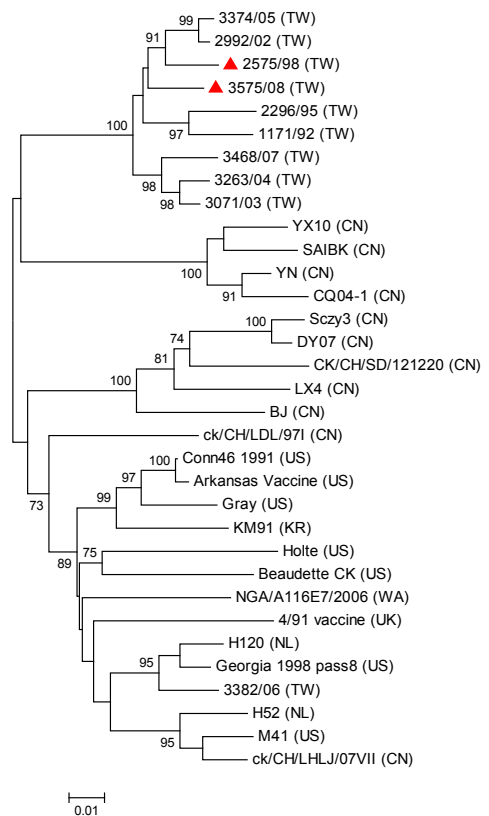

**Supplementary Figure S2.** Venn diagram of immune genes stimulated by IBV 3575/08, 2575 WT and 2575 AT at 24 hpi.

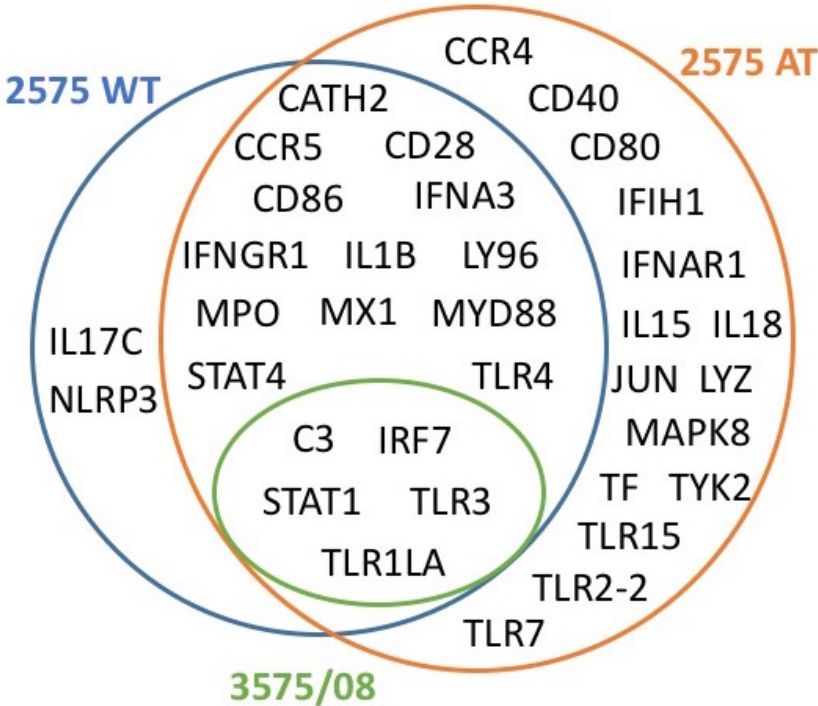

**Supplementary Table S1.** Cross neutralization test of IBVs. Homologous titers are indicated in bold.

| IBV strain           | Virus          |                |                 |             |
|----------------------|----------------|----------------|-----------------|-------------|
|                      | 3575/08 (TW-I) | 2575/98 (TW-I) | 2296/95 (TW-II) | H120 (Mass) |
| Serum 3575/08 (TW-I) | <b>8192</b>    | 102            | 34              | 16          |
| 2575/98 (TW-I)       | 128            | <b>1475</b>    | 108             | 16          |
| 2296/95 (TW-II)      | 140            | 101            | <b>512</b>      | 203         |
| H120 (Mass)          | 32             | 32             | 22              | <b>531</b>  |

**Supplementary Table S2.** Quantitative PCR Array data from infected chicken lungs. A RT<sup>2</sup> Profiler Chicken Innate & Adaptive Immune Responses PCR Array (PAGG-052ZG; SABiosciences) was performed following the manufacturer's protocol. Complete list of 84 genes that were examined in the PCR array is presented. Fold change and its 95% confidence interval (CI) were calculated based upon naive chickens for IBV 3575/08, 2575 WT or 2575 AT-infected chickens using software provided by the manufacturer at 24h and 48h post infection. Numbers in red indicate fold change greater than 3.

| Gene sym. | Description                                                        | 24 hpi      |                 |             |                  |             |                  |             |                  |             |                 | 48 hpi      |                 |  |  |
|-----------|--------------------------------------------------------------------|-------------|-----------------|-------------|------------------|-------------|------------------|-------------|------------------|-------------|-----------------|-------------|-----------------|--|--|
|           |                                                                    | 3575/08     |                 | 2575 WT     |                  | 2575 AT     |                  | 3575/08     |                  | 2575 WT     |                 | 2575 AT     |                 |  |  |
|           |                                                                    | Fold change | 95% CI          | Fold change | 95% CI           | Fold change | 95% CI           | Fold change | 95% CI           | Fold change | 95% CI          | Fold change | 95% CI          |  |  |
| C3        | Complement component 3                                             | 5.00        | (2.23, 7.76)    | 3.01        | (2.23, 5.50)     | 8.12        | (0.00001, 23.01) | 8.02        | (0.00001, 17.85) | 0.99        | (0.92, 1.05)    | 1.53        | (0.00001, 3.43) |  |  |
| CSA1      | Complement component 5a receptor 1                                 | 1.08        | (0.37, 1.79)    | 1.60        | (0.07, 3.13)     | 1.92        | (1.08, 2.76)     | 2.35        | (0.38, 4.32)     | 1.73        | (1.4, 2.08)     | 1.91        | (0.93, 1.69)    |  |  |
| CAT2      | Cathepsin A (cathepsin B paralog)                                  | 2.07        | (0.00001, 4.80) | 6.10        | (2.01, 10.19)    | 8.12        | (0.00001, 22.12) | 10.46       | (0.18, 20.78)    | 6.75        | (1.72, 20.25)   | 2.15        | (0.57, 7.73)    |  |  |
| CASP1     | Caspase 1, apoptosis-related cysteine peptidase                    | 0.95        | (0.45, 1.45)    | 1.05        | (0.26, 1.84)     | 1.83        | (1.02, 2.64)     | 1.13        | (0.11, 2.15)     | 0.88        | (0.75, 1.01)    | 0.98        | (0.65, 1.31)    |  |  |
| CASP9     | Caspase 9, apoptosis-related cysteine peptidase                    | 0.99        | (0.55, 1.43)    | 0.89        | (0.49, 1.29)     | 1.45        | (0.84, 2.06)     | 0.69        | (0.35, 1.03)     | 0.61        | (0.46, 0.77)    | 0.87        | (0.53, 1.21)    |  |  |
| CC14      | Chemokine (C-C motif) ligand 4                                     | 1.47        | (0.44, 2.50)    | 2.67        | (1.48, 3.86)     | 1.92        | (1.08, 2.76)     | 2.68        | (0.00001, 5.48)  | 1.73        | (1.4, 2.08)     | 1.74        | (0.62, 2.86)    |  |  |
| CC15      | Chemokine (C-C motif) ligand 5                                     | 1.07        | (0.36, 1.78)    | 1.87        | (0.67, 3.07)     | 1.8         | (0.91, 2.69)     | 2.20        | (0.29, 4.11)     | 1.62        | (1.31, 1.95)    | 1.73        | (0.77, 1.69)    |  |  |
| CC16      | Chemokine (C-C motif) receptor 4                                   | 1.10        | (0.40, 1.80)    | 2.24        | (1.20, 3.28)     | 3.34        | (0.00001, 6.97)  | 2.33        | (0.37, 4.29)     | 1.71        | (1.39, 2.06)    | 1.30        | (0.91, 1.69)    |  |  |
| CCR5      | Chemokine (C-C motif) receptor 5                                   | 2.74        | (0.00001, 5.90) | 4.77        | (0.79, 8.75)     | 12.03       | (0.00001, 37.15) | 2.96        | (0.00001, 7.80)  | 1.43        | (1.16, 1.72)    | 1.49        | (0.81, 2.50)    |  |  |
| CCR6      | Chemokine (C-C motif) receptor 6                                   | 1.08        | (0.37, 1.79)    | 1.30        | (0.00001, 3.03)  | 1.92        | (1.08, 2.76)     | 2.35        | (0.38, 4.32)     | 1.73        | (1.4, 2.08)     | 1.31        | (0.93, 1.69)    |  |  |
| CCR8      | Chemokine (C-C motif) receptor 8                                   | 0.89        | (0.26, 1.52)    | 2.20        | (1.07, 3.33)     | 1.92        | (1.13, 2.71)     | 1.94        | (0.24, 3.64)     | 1.73        | (1.6, 1.85)     | 1.20        | (0.71, 1.69)    |  |  |
| CD14      | CD14 molecule                                                      | 1.08        | (0.37, 1.79)    | 1.30        | (0.00001, 3.03)  | 1.92        | (1.08, 2.76)     | 2.35        | (0.38, 4.32)     | 1.73        | (1.4, 2.08)     | 1.31        | (0.93, 1.69)    |  |  |
| CD28      | CD28 molecule                                                      | 1.72        | (0.00001, 3.48) | 3.29        | (1.19, 5.39)     | 14.47       | (6.42, 22.52)    | 3.99        | (0.00001, 11.75) | 2.56        | (1.86, 3.34)    | 1.77        | (1.38, 5.56)    |  |  |
| CD4       | CD4 molecule                                                       | 1.71        | (0.19, 3.23)    | 2.84        | (1.43, 4.25)     | 2.95        | (1.26, 4.64)     | 2.66        | (0.96, 4.36)     | 1.73        | (1.4, 2.08)     | 3.47        | (0.70, 2.84)    |  |  |
| CD40      | CD40 molecule, TNF receptor superfamily, member 5                  | 1.65        | (0.00001, 3.92) | 2.92        | (0.00001, 6.11)  | 4.45        | (1.28, 7.62)     | 3.84        | (0.00001, 10.30) | 1.35        | (1.09, 1.63)    | 1.78        | (0.17, 3.39)    |  |  |
| CD40LG    | CD40 ligand (TNF superfamily, member 5, hyper-IgM syndrome)        | 1.07        | (0.28, 1.90)    | 2.97        | (0.33, 5.61)     | 1.9         | (0.51, 3.29)     | 2.37        | (0.00001, 5.29)  | 1.48        | (1.16, 1.83)    | 1.51        | (0.32, 2.70)    |  |  |
| CD80      | CD80 molecule                                                      | 1.01        | (0.46, 1.56)    | 2.42        | (1.47, 3.37)     | 3.05        | (0.92, 5.18)     | 2.47        | (0.76, 4.18)     | 1.49        | (1.21, 1.79)    | 1.20        | (1.02, 1.38)    |  |  |
| CD86      | CD86 molecule                                                      | 1.89        | (0.12, 3.66)    | 4.10        | (0.38, 7.82)     | 8.25        | (2.90, 13.60)    | 2.77        | (0.00001, 5.81)  | 1.73        | (1.4, 2.08)     | 1.73        | (0.62, 2.84)    |  |  |
| CD8A      | CD8a molecule                                                      | 0.71        | (0.20, 1.20)    | 2.24        | (0.45, 4.03)     | 1.56        | (0.92, 2.20)     | 1.54        | (0.00001, 2.88)  | 1.13        | (0.92, 1.36)    | 0.66        | (0.54, 1.18)    |  |  |
| CRP       | C-reactive protein, pentraxin-related                              | 1.08        | (0.37, 1.79)    | 1.30        | (0.00001, 3.03)  | 1.92        | (1.08, 2.76)     | 2.35        | (0.38, 4.32)     | 1.73        | (1.4, 2.08)     | 1.31        | (0.93, 1.69)    |  |  |
| CSF2      | Granulocyte-macrophage colony-stimulating factor                   | 1.08        | (0.37, 1.79)    | 1.30        | (0.00001, 3.03)  | 1.92        | (1.08, 2.76)     | 2.35        | (0.38, 4.32)     | 1.73        | (1.4, 2.08)     | 1.31        | (0.93, 1.69)    |  |  |
| CXCL12    | Chemokine (C-C motif) ligand 12 (stromal cell-derived factor 1)    | 0.87        | (0.00001, 1.85) | 0.56        | (0.00001, 1.35)  | 1.43        | (0.50, 2.36)     | 1.98        | (0.00001, 4.37)  | 1.53        | (1.45, 1.63)    | 0.68        | (0.23, 1.13)    |  |  |
| CCR4      | Chemokine (C-C motif) receptor 4                                   | 0.79        | (0.05, 1.53)    | 1.14        | (0.79, 2.09)     | 0.77        | (0.00001, 1.93)  | 0.95        | (0.50, 1.40)     | 0.58        | (0.55, 0.61)    | 0.48        | (0.03, 0.93)    |  |  |
| FAS       | Fas (TNF receptor superfamily, member 6)                           | 1.47        | (0.00001, 2.97) | 1.85        | (0.10, 3.60)     | 2.35        | (0.01, 4.69)     | 2.67        | (0.00001, 6.34)  | 1.85        | (1.15, 2.69)    | 0.77        | (0.13, 1.41)    |  |  |
| FASLG     | Fas ligand (TNF superfamily, member 6)                             | 1.08        | (0.37, 1.79)    | 2.02        | (0.84, 3.20)     | 1.97        | (1.18, 2.76)     | 4.17        | (1.77, 6.57)     | 1.73        | (1.4, 2.08)     | 1.31        | (0.93, 1.69)    |  |  |
| GATA3     | GATA binding protein 3                                             | 1.40        | (0.09, 2.71)    | 2.29        | (0.29, 4.29)     | 1.39        | (0.33, 2.45)     | 1.04        | (0.00001, 2.30)  | 1.01        | (0.77, 1.28)    | 0.78        | (0.03, 1.53)    |  |  |
| IFIH1     | Interferon induced with helicase C domain 1                        | 1.97        | (0.00001, 4.34) | 1.88        | (0.92, 2.84)     | 3.35        | (1.92, 4.78)     | 1.20        | (0.25, 2.15)     | 1.60        | (1.38, 1.83)    | 0.75        | (0.34, 1.16)    |  |  |
| IFNA3     | Interferon                                                         | 1.20        | (0.33, 2.08)    | 3.09        | (2.04, 4.15)     | 27.63       | (9.59, 45.67)    | 5.62        | (1.39, 9.85)     | 1.36        | (1.1, 1.64)     | 14.66       | (1.99, 27.33)   |  |  |
| IFNA1     | Interferon (alpha, beta and omega) receptor 1                      | 1.10        | (0.00001, 2.34) | 2.58        | (0.00001, 5.25)  | 3.59        | (0.81, 6.37)     | 2.39        | (0.02, 4.76)     | 1.90        | (1.28, 2.62)    | 0.95        | (0.00001, 1.96) |  |  |
| IFNB      | Interferon beta                                                    | 1.21        | (0.47, 1.93)    | 2.17        | (1.09, 3.25)     | 1.92        | (1.08, 2.76)     | 2.35        | (0.38, 4.32)     | 1.73        | (1.4, 2.08)     | 1.31        | (0.93, 1.69)    |  |  |
| IFNG      | Interferon, gamma                                                  | 1.08        | (0.37, 1.79)    | 1.30        | (0.00001, 3.03)  | 1.92        | (1.08, 2.76)     | 2.35        | (0.38, 4.32)     | 1.73        | (1.4, 2.08)     | 1.31        | (0.93, 1.69)    |  |  |
| IFNGR1    | Interferon gamma receptor 1                                        | 1.31        | (0.00001, 3.55) | 3.54        | (0.00001, 7.40)  | 3.67        | (1.96, 5.38)     | 3.36        | (0.00001, 7.12)  | 1.61        | (0.79, 2.71)    | 1.88        | (0.43, 3.33)    |  |  |
| IL10      | Interleukin 10                                                     | 1.08        | (0.37, 1.79)    | 1.30        | (0.00001, 3.03)  | 1.92        | (1.08, 2.76)     | 2.35        | (0.38, 4.32)     | 1.73        | (1.4, 2.08)     | 1.31        | (0.93, 1.69)    |  |  |
| IL13      | Interleukin 13                                                     | 0.13        | (0.00001, 0.70) | 0.17        | (0.00001, 0.94)  | 0.22        | (0.00001, 1.18)  | 0.34        | (0.00001, 1.83)  | 0.43        | (0.2, 0.43)     | 0.15        | (0.00001, 0.81) |  |  |
| IL15      | Interleukin 15                                                     | 1.45        | (0.00001, 2.98) | 2.02        | (0.44, 3.60)     | 5.06        | (4.58, 5.54)     | 2.75        | (0.14, 5.36)     | 1.29        | (0.87, 3.38)    | 1.34        | (0.98, 1.70)    |  |  |
| IL18      | Interleukin 18 (interferon-gamma-inducing factor)                  | 1.46        | (0.44, 2.48)    | 2.12        | (0.68, 3.56)     | 3.21        | (2.16, 4.26)     | 2.20        | (0.93, 3.47)     | 1.75        | (1.66, 1.84)    | 1.27        | (0.88, 1.66)    |  |  |
| IL18      | Interleukin 1, beta                                                | 1.44        | (0.5, 2.63)     | 3.83        | (0.00001, 7.66)  | 4.96        | (0.00001, 9.99)  | 2.79        | (0.26, 3.32)     | 1.59        | (0.39, 1.91)    | 1.53        | (0.53, 2.51)    |  |  |
| IL1R1     | Interleukin 1 receptor, type 1                                     | 1.54        | (0.00001, 1.10) | 1.18        | (0.16, 2.01)     | 1.7         | (0.00001, 3.54)  | 1.07        | (0.00, 2.14)     | 0.58        | (0.07, 0.59)    | 1.07        | (0.28, 1.72)    |  |  |
| IL2       | Interleukin 2                                                      | 0.95        | (0.39, 1.51)    | 1.59        | (0.49, 2.69)     | 1.69        | (1.13, 2.25)     | 2.07        | (0.44, 3.70)     | 1.52        | (1.23, 1.83)    | 1.15        | (1.08, 1.22)    |  |  |
| IL4       | Interleukin 4                                                      | 0.99        | (0.39, 1.59)    | 1.58        | (0.34, 2.82)     | 1.75        | (1.14, 2.36)     | 2.15        | (0.44, 3.86)     | 1.58        | (1.28, 1.9)     | 1.20        | (1.06, 1.34)    |  |  |
| IL5       | Interleukin 5                                                      | 1.08        | (0.37, 1.79)    | 1.30        | (0.00001, 3.03)  | 1.92        | (1.08, 2.76)     | 2.35        | (0.38, 4.32)     | 1.73        | (1.4, 2.08)     | 1.32        | (0.94, 1.70)    |  |  |
| IL6       | Interleukin 6 (interferon, beta 2)                                 | 1.08        | (0.37, 1.79)    | 2.64        | (0.00001, 7.59)  | 1.92        | (1.08, 2.76)     | 2.35        | (0.38, 4.32)     | 1.73        | (1.4, 2.08)     | 1.31        | (0.93, 1.69)    |  |  |
| IL8       | Interleukin 8                                                      | 0.95        | (0.23, 1.67)    | 1.14        | (0.00001, 2.71)  | 1.68        | (0.72, 2.64)     | 2.06        | (0.7, 3.95)      | 1.52        | (1.23, 1.82)    | 1.15        | (0.61, 1.69)    |  |  |
| IRAK1     | Interleukin 1 receptor associated kinase 4                         | 1.00        | (0.10, 1.90)    | 1.09        | (0.46, 1.72)     | 1.97        | (1.13, 2.81)     | 0.67        | (0.00001, 1.51)  | 0.66        | (0.39, 1.01)    | 0.51        | (0.00001, 1.21) |  |  |
| IRF1      | Interferon regulatory factor 1                                     | 2.26        | (0.14, 4.38)    | 2.61        | (0.97, 4.25)     | 1.86        | (0.55, 3.17)     | 1.05        | (0.00001, 2.45)  | 1.64        | (1.3, 2.01)     | 0.45        | (0.00001, 0.98) |  |  |
| IRF6      | Interferon regulatory factor 6                                     | 1.23        | (0.31, 2.15)    | 0.71        | (0.13, 2.19)     | 1.55        | (0.52, 2.58)     | 1.18        | (0.00001, 2.48)  | 1.49        | (1.37, 1.6)     | 1.33        | (0.81, 1.85)    |  |  |
| IRF7      | Interferon regulatory factor 7                                     | 3.44        | (0.00001, 8.01) | 11.26       | (0.40, 22.12)    | 4.9         | (0.53, 9.27)     | 2.18        | (0.00001, 4.63)  | 1.71        | (1.28, 1.18)    | 1.40        | (0.00001, 3.19) |  |  |
| ITGB2     | Integrin, beta 2 (complement component 3 receptor 3 and 4 subunit) | 1.08        | (0.37, 1.79)    | 1.30        | (0.00001, 3.03)  | 1.92        | (1.08, 2.76)     | 3.00        | (1.55, 4.45)     | 1.73        | (1.4, 2.08)     | 1.31        | (0.93, 1.69)    |  |  |
| JAK2      | Janus kinase 2 (a protein tyrosine kinase)                         | 0.88        | (0.37, 1.39)    | 1.59        | (0.70, 2.48)     | 1.43        | (0.66, 2.20)     | 1.31        | (0.00001, 3.04)  | 0.46        | (0.40, 0.49)    | 0.68        | (0.18, 1.18)    |  |  |
| JUN       | Jun proto-oncogene                                                 | 1.16        | (0.00001, 2.79) | 1.77        | (0.35, 3.19)     | 3.8         | (0.00001, 7.81)  | 1.93        | (0.27, 3.59)     | 0.50        | (0.39, 0.63)    | 2.18        | (0.5, 3.41)     |  |  |
| LITAF     | Lipopolysaccharide-induced TNF factor                              | 0.54        | (0.19, 0.89)    | 1.08        | (0.22, 1.94)     | 1.11        | (0.50, 1.72)     | 0.81        | (0.11, 1.51)     | 1.01        | (0.69, 1.38)    | 0.26        | (0.16, 0.36)    |  |  |
| IL17C     | Interleukin-17C-like                                               | 1.08        | (0.37, 1.79)    | 4.56        | (0.00001, 18.66) | 1.92        | (1.08, 2.76)     | 2.35        | (0.38, 4.32)     | 1.73        | (1.4, 2.08)     | 1.31        | (0.93, 1.69)    |  |  |
| STAT6     | Signal transducer and transcription activator 6-like               | 1.73        | (0.00001, 3.51) | 2.58        | (0.40, 4.76)     | 2.04        | (0.00001, 4.12)  | 2.27        | (0.10, 4.44)     | 1.34        | (0.74, 2.1)     | 1.05        | (0.00001, 2.21) |  |  |
| TYK2      | Similar to MGC83617 protein                                        | 1.44        | (0.00001, 4.04) | 2.61        | (0.00001, 6.44)  | 3.5         | (0.00001, 7.61)  | 1.82        | (0.00001, 4.79)  | 0.44        | (0.36, 0.53)    | 1.96        | (0.00001, 4.34) |  |  |
| TF        | Lactotransferrin                                                   | 1.14        | (0.00001, 2.91) | 1.92        | (0.87, 2.97)     | 3.01        | (0.46, 5.56)     | 4.67        | (1.83, 7.51)     | 1.22        | (0.78, 1.75)    | 1.75        | (0.65, 2.85)    |  |  |
| LY96      | Lymphocyte antigen 96                                              | 2.36        | (0.00001, 5.18) | 3.49        | (0.00001, 7.92)  | 12.83       | (3.23, 22.43)    | 2.54        | (0.00001, 6.14)  | 2.52        | (1.2, 4.31)     | 1.59        | (0.00001, 3.20) |  |  |
| LYZ       | Lysozyme (renal amyloidosis)                                       | 1.82        | (0.00001, 4.93) | 2.43        | (0.00001, 6.15)  | 4.14        | (0.00001, 10.79) | 3.03        | (0.00001, 7.04)  | 1.99        | (0.00001, 5.46) | 1.44        | (0.00001, 3.30) |  |  |
| MAPK1     | Mitogen-activated protein kinase 1                                 | 1.47        | (0.50, 2.14)    | 1.23        | (0.55, 1.91)     | 0.99        | (0.57, 1.41)     | 1.25        | (0.00001, 2.66)  | 1.16        | (0.92, 1.42)    | 0.77        | (0.53, 1.21)    |  |  |
| MAPK14    | Mitogen-activated protein kinase 14                                | 1.78        | (0.50, 3.06)    | 2.11        | (1.11, 3.11)     | 1.29        | (1.59, 3.99)     | 2.00        | (0.09, 3.91)     | 1.14        | (0.94, 1.35)    | 1.06        | (0.53, 1.59)    |  |  |
| MAPK8     | Mitogen-activated protein kinase 8                                 | 2.71        | (0.00001, 7.20) | 2.40        | (0.00001, 6.82)  | 8.52        | (0.00001, 20.87) | 3.04        | (0.00001, 9.18)  | 0.79        | (0.52, 1.11)    | 3.28        | (0.00001, 8.05) |  |  |
| MBL2      | Mannose-binding lectin (protein C) 2, soluble                      | 1.08        | (0.37, 1.79)    | 1.30        | (0.00001, 3.03)  | 1.92        | (1.08, 2.76)     | 4.56        | (2.41, 6.71)     | 1.97        | (1.92, 2.1)     | 1.32        | (0.94, 1.72)    |  |  |
| MPO       | Myeloperoxidase                                                    | 1.13        | (0.42, 1.84)    | 3.10        | (1.22, 4.98)     | 6.52        | (3.32, 9.72)     | 2.35        | (0.38, 4.32)     | 1.87        | (1.34, 2.47)    | 1.93        | (0.87, 2.39)    |  |  |
| MX1       | Myxovirus resistance 1, interferon-inducible protein p78 (mouse)   | 2           |                 |             |                  |             |                  |             |                  |             |                 |             |                 |  |  |

**Supplementary Table S3.** Primers used to amplify the complete genomic sequence of IBV 3575/08.

| Location <sup>a</sup> | Length (bp) | Forward primer (5'→3')     | Reverse primer (5'→3')  |
|-----------------------|-------------|----------------------------|-------------------------|
| 1-3009                | 3009        | ACTGAAAATAGATATTAATATATATC | CTTGCCGGGTCTTGTATAAG    |
| 2502-4403             | 1902        | CACCAATGTCACAACCTTGGT      | CACGCCACTCAAGTATAACA    |
| 2985-5732             | 2748        | TGGCTCTTATAACAAGACCCG      | AATGTCCACGTGTACTTCCA    |
| 5011-7691             | 2681        | GAATGAAAGTTCTTTACCTG       | TGGCTGTTACAATTGGACAG    |
| 7084-9024             | 1941        | AGTGGAAATATACAGGTGACG      | CAAAGCCCATTAAGATTGTTG   |
| 8509-9961             | 1453        | AATGCATTGCTGGCTTGTGT       | CCTAAGTGGCACTGCCGT      |
| 9663-11669            | 2007        | CACCATTTTCTACTAGTACTGC     | CTACACCTGCTACGCAAGC     |
| 11572-15221           | 3650        | CTTGACTAGGAATGGGCATAAT     | ACTACACAGACGCCACAAG     |
| 14717-16297           | 1581        | CCAAACAAGGTCTTGTAGCAG      | CTTCTGGCAAGGCATTAATAGTA |
| 16184-17725           | 1542        | ACGATTGCACTCGTATAGTA       | CATCCATTA AAAAGTGGGTAGT |
| 17505-20183           | 2679        | GTTAGCGGACAATTTATGCA       | GAAGCATTAACTGCTGTACA    |
| 20001-21037           | 1037        | CGTAGTAGCCAATAATGGCA       | GGATTTAGGCCGTCCTGATTT   |
| 20375-22875           | 2501        | AAACTGAACAAAAGACAGACTTAG   | CCTTCCTGCATATGACCAA     |
| 21969-23915           | 1947        | TTCTGACTTCTCGTAATGA        | TGTATTGTT CAGTTACCACA   |
| 23189-25686           | 2498        | TTTTGTGGTAGTGGAAGACA       | TTGAGTTAATAGTAGGGATTT   |
| 24532-26607           | 2076        | GTTATTGTTAACGAGTTTCCWA     | GCTGCACGAGCAATAAGA      |
| 25884-27462           | 1579        | GGATTAGATTGTGTTTACTT       | AGCTACATGCCTATCTTCC     |

<sup>a</sup>Locations are listed according to IBV strain 2575/98 (accession no. DQ646405).

**Supplementary Table S4.** IBV reference strains included in this study.

| <b>Strain</b>    | <b>Accession no.</b>  | <b>Country</b> | <b>Strain</b>      | <b>Accession no.</b>  | <b>Country</b> |
|------------------|-----------------------|----------------|--------------------|-----------------------|----------------|
| Vic              | DQ490221 <sup>a</sup> | Australia      | 1171/92            | DQ646406 <sup>b</sup> | Taiwan         |
| Armidale         | DQ490205 <sup>a</sup> | Australia      | 2296/95            | DQ646404 <sup>b</sup> | Taiwan         |
| Sczy3            | JF732903              | China          | 2575/98            | DQ646405              | Taiwan         |
| YN               | JF893452              | China          | 2992/02            | EU822340 <sup>b</sup> | Taiwan         |
| LX4              | AY338732              | China          | 3071/03            | EU822340 <sup>b</sup> | Taiwan         |
| BJ               | AY319651              | China          | 3263/04            | EU822338 <sup>b</sup> | Taiwan         |
| YX10             | JX840411              | China          | 3374/05            | EU822338 <sup>b</sup> | Taiwan         |
| DY07             | HM245923              | China          | 3382/06            | GQ229232 <sup>b</sup> | Taiwan         |
| CK/CH/SD/121220  | KJ128295              | China          | 3468/07            | EU822338 <sup>b</sup> | Taiwan         |
| CQ04-1           | HM245924              | China          | 4/91 vaccine       | KF377577              | UK             |
| SAIBK            | DQ288927              | China          | Conn46 1991        | FJ904719              | USA            |
| CK/CH/LHLJ/07VII | JF274479              | China          | Gray               | GU393334              | USA            |
| GX-NN09032       | JX897900              | China          | Holte              | GU393336              | USA            |
| CK/CH/LDL/97I    | JX195177              | China          | M41                | DQ834384              | USA            |
| H52              | EU817497              | Netherlands    | Beaudette CK       | AJ311317              | USA            |
| H120             | FJ888351              | Netherlands    | Georgia 1998 pass8 | GQ504722              | USA            |
| KM91             | JQ977698              | South Korea    | Arkansas Vaccine   | GQ504721              | USA            |
| NGA/A116E7/2006  | FN430415              | Nigeria        | --                 | --                    | --             |

<sup>a</sup>Sequences used for S gene comparison.

<sup>b</sup>Sequences used for S-N gene comparison.
